# Supplementary material
Source: PubMed Central journal article supplement (PMC156306)
Supplement: pnas_0933416100_1.pdf [file pnas_0933416100_1.pdf]

Supplement – Reverse engineering gene networks  
— integrating  
genetic perturbations with dynamical modeling

Jesper Tegnér<sup>1,2</sup>, M. K. Stephen Yeung<sup>1</sup>, Jeff Hasty<sup>1</sup>, and  
James J. Collins<sup>1</sup>

## SUPPORTING TEXT.

Here we provide the equations for the single cell network, governed by 10 nonlinear equations describing the time evolution of both proteins (in capital) and genes. These equations represent the single cell in the network model of von Dassow *et al.* (1). We have therefore omitted diffusive coupling terms in the original model.

$$\frac{d en}{dt} = \frac{T_0}{H_{en}} \left[ \frac{EWG(1 - \frac{CN^{vCN,en}}{\kappa_{CN,en}^{vCN,en} + CN^{vCN,en}})^{vWG,en}}{\kappa_{WG,en}^{vWG,en} + EWG(1 - \frac{CN^{vCN,en}}{\kappa_{CN,en}^{vCN,en} + CN^{vCN,en}})^{vWG,en}} - en \right] \quad [1]$$

$$\frac{d EN}{dt} = \frac{T_0}{H_{EN}} [en - EN] \quad [2]$$

$$\frac{d wg}{dt} = \frac{T_0}{H_{wg}} \left[ \frac{\alpha_{CI,wg} \left[ \frac{CI(1 - \frac{CN^{vCN,wg}}{\kappa_{CN,wg}^{vCN,wg} + CN^{vCN,wg}})^{vCI,wg}}{\kappa_{CI,wg}^{vCI,wg} + CI(1 - \frac{CN^{vCN,wg}}{\kappa_{CN,wg}^{vCN,wg} + CN^{vCN,wg}})^{vCI,wg}} \right] + \alpha_{WG,wg} \left[ \frac{IWG^{vWG,wg}}{\kappa_{WG,wg}^{vWG,wg} + IWG^{vWG,wg}} \right]}{1 + \alpha_{CI,wg} \left[ \frac{CI(1 - \frac{CN^{vCN,wg}}{\kappa_{CN,wg}^{vCN,wg} + CN^{vCN,wg}})^{vCI,wg}}{\kappa_{CI,wg}^{vCI,wg} + CI(1 - \frac{CN^{vCN,wg}}{\kappa_{CN,wg}^{vCN,wg} + CN^{vCN,wg}})^{vCI,wg}} \right] + \alpha_{WG,wg} \left[ \frac{IWG^{vWG,wg}}{\kappa_{WG,wg}^{vWG,wg} + IWG^{vWG,wg}} \right]} - \frac{wg T_0}{H_{wg}} \right] \quad [3]$$

$$\frac{d IWG}{dt} = \frac{T_0}{H_{IWG}} [wg - IWG] \quad [4]$$

$$\frac{d ptc}{dt} = \frac{T_0}{H_{PTC}} \left[ \frac{CI(1 - \frac{CN^{vCN,ptc}}{\kappa_{CN,ptc}^{vCN,ptc} + CN^{vCN,ptc}})^{vCI,ptc}}{\kappa_{CI,ptc}^{vCI,ptc} + CI(1 - \frac{CN^{vCN,ptc}}{\kappa_{CN,ptc}^{vCN,ptc} + CN^{vCN,ptc}})^{vCI,ptc}} - ptc \right] \quad [5]$$

$$\frac{d PTC}{dt} = \frac{T_0}{H_{PTC}} [ptc/6 - PTC] \quad [6]$$

$$\frac{d ci}{dt} = \frac{T_0}{H_{ci}} \left[ \frac{B(1 - \frac{EN^v EN, ci}{\kappa_{EN, ci}^v EN, ci + EN^v EN, ci})^{v_{B, ci}}}{\kappa_{B, ci}^{v_{B, ci}} + B(1 - \frac{EN^v EN, ci}{\kappa_{EN, ci}^v EN, ci + EN^v EN, ci})^{v_{B, ci}}} - ci \right] \quad [7]$$

$$\frac{d CI}{dt} = \frac{T_0}{H_{CI}} (ci - CI) - T_0 C_{CI} CI \left[ \frac{PTC^{v_{PTC, CI}}}{\kappa_{PTC, CI}^{v_{PTC, CI}} + PTC^{v_{PTC, CI}}} \right] \quad [8]$$

$$\frac{d CN}{dt} = T_0 C_{CI} CI \left[ \frac{PTC^{v_{PTC, CI}}}{\kappa_{PTC, CI}^{v_{PTC, CI}} + PTC^{v_{PTC, CI}}} \right] - \frac{T_0 CN}{H_{CI}} \quad [9]$$

$$\frac{d hh}{dt} = \frac{T_0}{H_{hh}} \left[ \frac{EN(1 - \frac{CN^v CN, hh}{\kappa_{CN, hh}^v CN, hh + CN^v CN, hh})^{v_{EN, hh}}}{\kappa_{EN, hh}^{v_{EN, hh}} + EN(1 - \frac{CN^v CN, hh}{\kappa_{CN, hh}^v CN, hh + CN^v CN, hh})^{v_{EN, hh}}} - hh \right] \quad [10]$$

The half-maximal activation coefficient is governed by  $\kappa$ , saturability coefficient for enhancer  $\alpha$ , half-life (inverse of degradation rate), and  $v$  is the Hill coefficient. For further details consult von Dassow *et al.* (1). Parameters are  $\kappa = 0.1$ ,  $H = 10$ ,  $T_0 = 1$ ,  $v = 1.1$ ,  $EWG = 0.5$ ,  $B = 1$  (dummy parameter for basal expression), and  $\alpha_{CI, wg} = \alpha_{WG, wg} = 0.1$ .

## Reference

1. von Dassow, G., Eli, M., Munro, E. M. & Odell, G. M. (2000) *Nature* **406**, 188 - 192.
